# Supplementary material for: Restored Fyn Levels in Huntington’s Disease Contributes to Enhanced Synaptic GluN2B-Composed NMDA Receptors and CREB Activity
Source: MDPI journal article supplement (doi:10.3390/cells11193063), 2022-09-29
Supplement: s1 [file s1]

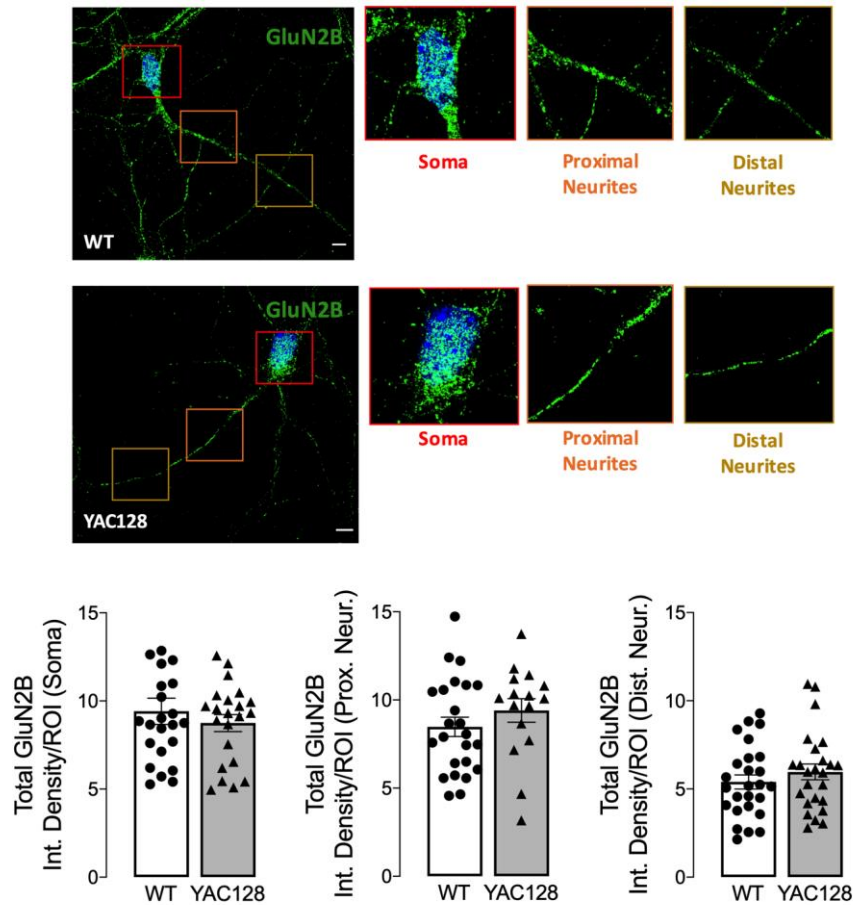

**Figure S1: Total GluN2B-NMDAR levels in WT and YAC128 striatal neurons.** The total levels of GluN2B were evaluated by immunocytochemistry, in soma, proximal and distal neurites, using confocal microscope and Image J software in YAC128 vs. WT striatal neurons. Confocal images were obtained with a 63× objective in confocal microscope Zeiss LSM 710 (scale bar: 10  $\mu$ m). Data are presented as the mean  $\pm$  SEM of 4 independent experiments analyzing 5 to 8 cells *per condition per culture*.

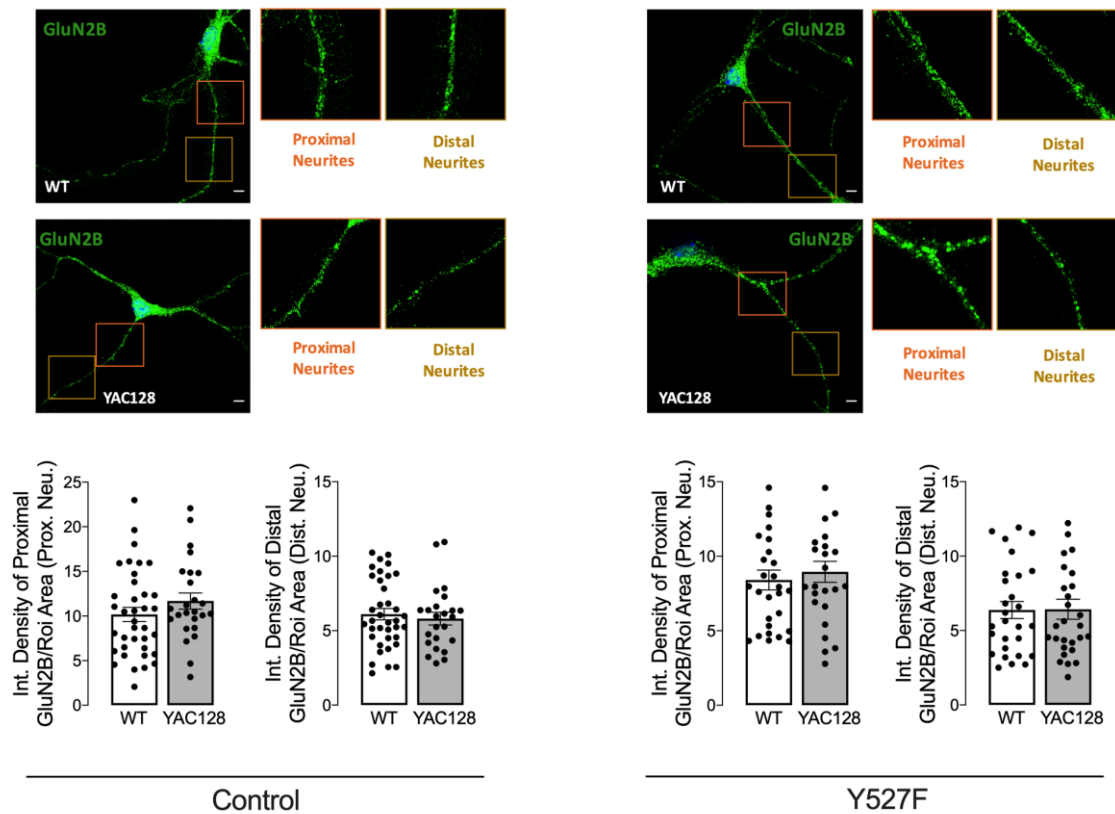

**Figure S2: Total GluN2B-NMDAR levels in WT and YAC128 striatal neurons after transfection with Y527F plasmid.** The total levels of GluN2B were evaluated by immunocytochemistry, in proximal and distal neurites, using confocal microscope and Image J software in YAC128 vs. WT striatal neurons, after transfection with Y527F or control plasmid. Confocal images were obtained with a 63× objective in confocal microscope Zeiss LSM 710 (scale bar: 10  $\mu$ m). Data are presented as the mean  $\pm$  SEM of 4 independent experiments analyzing 6 to 8 cells *per condition per culture*.
